# Supplementary material
Source: MDPI journal article supplement (https://www.mdpi.com/2073-445X/9/3/71)
Supplement: s1 [file s1]

## Supplemental Online Materials

**Table S1.** Average treatment effects on the treated of outcomes using the common support approach.

| Sample                                         | Matching Algorithms   |     |                       |     |                       |             |                       |             |                       |     |
|------------------------------------------------|-----------------------|-----|-----------------------|-----|-----------------------|-------------|-----------------------|-------------|-----------------------|-----|
|                                                | NN 5                  |     | NN 10                 |     | Kernel                | Radius 0.01 |                       | Radius 0.02 |                       |     |
| <i>Outcome: Rice yield (kilograms/hectare)</i> |                       |     |                       |     |                       |             |                       |             |                       |     |
| <i>Treatment: Full land ownership</i>          |                       |     |                       |     |                       |             |                       |             |                       |     |
| Small                                          | 115.4688<br>(26.2694) | *** | 115.7656<br>(25.3125) | *** | 125.375<br>(25.5863)  | ***         | 124.8281<br>(25.8831) | ***         | 126.1488<br>(25.7931) | *** |
| Midsized                                       | 69.77375<br>(23.4456) | *** | 53.80875<br>(22.8319) | **  | 51.06625<br>(24.8125) | **          | 53.70688<br>(25.0938) | ***         | 53.18375<br>(24.9925) | **  |
| Large                                          | 45.75813<br>(24.6838) | *   | 43.63688<br>(23.9650) | *   | 31.04313<br>(28.2344) |             | 38.42188<br>(28.5588) |             | 37.13313<br>(28.4881) | *   |
| <i>Treatment: Weak land ownership</i>          |                       |     |                       |     |                       |             |                       |             |                       |     |
| Small                                          | 59.75375<br>(29.9688) | **  | 67.6525<br>(29.2269)  | **  | 58.34<br>(30.9100)    | *           | 65.4025<br>(31.4338)  | **          | 62.46125<br>(31.2775) | **  |
| Midsized                                       | -11.6756<br>(27.1056) |     | -16.7031<br>(26.4881) |     | -25.3475<br>(31.8594) | ***         | -18.9725<br>(32.6838) |             | -21.5744<br>(32.4650) |     |
| Large                                          | -31.0938<br>(30.9650) |     | -17.0038<br>(28.4613) |     | -26.0156<br>(34.6838) |             | -24.1756<br>(37.2656) |             | -23.0313<br>(36.8988) |     |
| <i>Outcome: Informal Debt (USD)</i>            |                       |     |                       |     |                       |             |                       |             |                       |     |
| <i>Treatment: Full land ownership</i>          |                       |     |                       |     |                       |             |                       |             |                       |     |
| Small                                          | -16.9079<br>(7.4742)  | **  | -16.6814<br>(7.2275)  | **  | -24.0248<br>(24.0858) | **          | -24.5253<br>(24.4782) | **          | -23.8904<br>(24.3578) | **  |
| Midsized                                       | -31.4379<br>(12.4377) | **  | -35.985<br>(14.2342)  | **  | -37.867<br>(16.3185)  | ***         | -37.6186<br>(16.5409) | **          | -37.1972<br>(16.4535) | *** |
| Large                                          | -3.6079<br>(34.9351)  |     | 1.3818<br>(33.2108)   |     | -21.4468<br>(42.8550) |             | -19.1396<br>(43.3162) |             | -19.8197<br>(43.2018) |     |
| <i>Treatment: Weak land ownership</i>          |                       |     |                       |     |                       |             |                       |             |                       |     |
| Small                                          | -19.1194<br>(18.1783) |     | -12.7742<br>(15.1473) |     | -12.8767<br>(17.8367) |             | -11.963<br>(18.0871)  |             | -12.0368<br>(18.0043) |     |
| Midsized                                       | -44.1565<br>(17.8270) | **  | -37.8387<br>(14.8407) | **  | -38.8004<br>(23.4118) | ***         | -37.6686<br>(24.0851) | ***         | -38.0038<br>(23.9052) | **  |
| Large                                          | -78.3085<br>(61.5336) |     | -76.208<br>(66.6165)  |     | -74.4021<br>(54.9717) |             | -71.3709<br>(59.1400) |             | -70.0449<br>(58.5078) |     |

Notes: Single, double, and triple asterisks (\*, \*\*, \*\*\*) indicate significance at the 10%, 5%, and 1% level. Standard errors are reported in parentheses. The standard errors for all matching algorithms are estimated using bootstrapping with 50 replications, except for the nearest neighbor (NN1) and oversampling (NN5), for which we use the analytical standard error suggested by [33].

**Table S2.** Matching quality indicators with trimming approach corresponding to the potential outcomes with the treatment variable of the *full* land ownership.

|                               | Before Matching |                       | After Matching        |                                   |
|-------------------------------|-----------------|-----------------------|-----------------------|-----------------------------------|
|                               | Mean Bias       | Pseudo R <sup>2</sup> | % Mean Bias Reduction | % Pseudo R <sup>2</sup> Reduction |
| <i>Outcome: Rice yield</i>    |                 |                       |                       |                                   |
| <i>Small Farm</i>             |                 |                       |                       |                                   |
| NN 5                          | 13.35           | 0.10                  | -86.63%               | -98.04%                           |
| NN 10                         | 13.35           | 0.10                  | -86.77%               | -98.04%                           |
| Kernel                        | <u>13.35</u>    | <u>0.10</u>           | <u>-89.47%</u>        | <u>-98.04%</u>                    |
| Radius caliper (0.01)         | 13.35           | 0.10                  | -87.56%               | -98.04%                           |
| Radius caliper (0.02)         | 13.35           | 0.10                  | -87.91%               | -98.04%                           |
| <i>Midsize Farm</i>           |                 |                       |                       |                                   |
| NN 5                          | 11.29           | 0.08                  | -90.26%               | -98.73%                           |
| NN 10                         | 11.29           | 0.08                  | -90.57%               | -98.73%                           |
| Kernel                        | 11.29           | 0.08                  | -90.14%               | -98.73%                           |
| Radius caliper (0.01)         | <u>11.29</u>    | <u>0.08</u>           | <u>-90.98%</u>        | <u>-98.73%</u>                    |
| Radius caliper (0.02)         | 11.29           | 0.08                  | -90.96%               | -98.73%                           |
| <i>Large Farm</i>             |                 |                       |                       |                                   |
| NN 5                          | 10.93           | 0.08                  | -82.82%               | -96.10%                           |
| NN 10                         | 10.93           | 0.08                  | -85.53%               | -97.40%                           |
| Kernel                        | <u>10.93</u>    | <u>0.08</u>           | <u>-86.54%</u>        | <u>-97.40%</u>                    |
| Radius caliper (0.01)         | 10.93           | 0.08                  | -85.85%               | -97.40%                           |
| Radius caliper (0.02)         | 10.93           | 0.08                  | -86.10%               | -97.40%                           |
| <i>Outcome: Informal debt</i> |                 |                       |                       |                                   |
| <i>Small Farm</i>             |                 |                       |                       |                                   |
| NN 5                          | 13.35           | 0.10                  | -88.12%               | -98.04%                           |
| NN 10                         | 13.35           | 0.10                  | -88.69%               | -99.02%                           |
| Kernel                        | <u>13.35</u>    | <u>0.10</u>           | <u>-91.11%</u>        | <u>-99.02%</u>                    |
| Radius caliper (0.01)         | 13.35           | 0.10                  | -89.17%               | -99.02%                           |
| Radius caliper (0.02)         | 13.35           | 0.10                  | -89.61%               | -99.02%                           |
| <i>Midsize Farm</i>           |                 |                       |                       |                                   |
| NN 5                          | 11.29           | 0.08                  | -91.71%               | -98.73%                           |
| NN 10                         | 11.29           | 0.08                  | -91.93%               | -98.73%                           |
| Kernel                        | 11.29           | 0.08                  | -91.44%               | -98.73%                           |
| Radius caliper (0.01)         | <u>11.29</u>    | <u>0.08</u>           | <u>-92.37%</u>        | <u>-98.73%</u>                    |
| Radius caliper (0.02)         | 11.29           | 0.08                  | -92.33%               | -98.73%                           |

Note: Results with common support are very similar. The mean standardized bias (SB) before matching is given by:

$$SB_{before} = 100 \cdot \frac{\bar{X}_1 - \bar{X}_0}{\sqrt{0.5 \cdot (V_1)(X) + (V_0)(X)}} \text{ and the SB after matching is given by}$$

$$SB_{after} = 100 \cdot \frac{\bar{X}_{1M} - \bar{X}_{0M}}{\sqrt{0.5 \cdot (V_{1M})(X) + (V_{0M})(X)}}$$

where  $X_1$  ( $V_1$ ) is the mean (variance) in the treatment group before matching and  $X_0$  ( $V_0$ ) the analogue for the control group.  $X_{1M}$  ( $V_{1M}$ ) and  $X_{0M}$  ( $V_{0M}$ ) are the corresponding values for the matched samples.

**Table S3.** Matching quality indicators with trimming approach corresponding to the potential outcomes with the treatment variable of the *weak* land ownership.

|                               | Before Matching |                       | After Matching        |                                   |
|-------------------------------|-----------------|-----------------------|-----------------------|-----------------------------------|
|                               | Mean Bias       | Pseudo R <sup>2</sup> | % Mean Bias Reduction | % Pseudo R <sup>2</sup> Reduction |
| <i>Outcome: Rice yield</i>    |                 |                       |                       |                                   |
| <i>Small Farm</i>             |                 |                       |                       |                                   |
| NN 5                          | 13.20           | <u>0.11</u>           | <u>-86.93%</u>        | <u>-98.15%</u>                    |
| NN 10                         | 13.20           | 0.11                  | -85.06%               | -98.15%                           |
| Kernel                        | 13.20           | 0.11                  | -83.00%               | -98.15%                           |
| Radius caliper (0.01)         | 13.20           | 0.11                  | -83.16%               | -98.15%                           |
| Radius caliper (0.02)         | 13.20           | 0.11                  | -83.32%               | -98.15%                           |
| <i>Outcome: Informal debt</i> |                 |                       |                       |                                   |
| <i>Midsize Farm</i>           |                 |                       |                       |                                   |
| NN 5                          | 12.18           | 0.10                  | -88.06%               | -99.04%                           |
| NN 10                         | 12.18           | 0.10                  | -86.72%               | -99.04%                           |
| Kernel                        | 12.18           | 0.10                  | -87.69%               | -99.04%                           |
| Radius caliper (0.01)         | 12.18           | 0.10                  | -87.64%               | -99.04%                           |
| Radius caliper (0.02)         | 12.18           | <u>0.10</u>           | <u>-88.26%</u>        | <u>-99.04%</u>                    |

Note: Results with common support are very similar. The mean standardized bias (SB) before matching is given by

$$SB_{before} = 100 \cdot \frac{\bar{x}_1 - \bar{x}_0}{\sqrt{0.5 \cdot (V_1)(X) + (V_0)(X)}} \text{ and the SB after matching is given by}$$

$$SB_{after} = 100 \cdot \frac{\bar{X}_{1M} - \bar{X}_{0M}}{\sqrt{0.5 \cdot (V_{1M})(X) + (V_{0M})(X)}}$$

where  $X_1 (V_1)$  is the mean (variance) in the treatment group before matching and  $X_0 (V_0)$  the analogue for the control group.  $X_{1M} (V_{1M})$  and  $X_{0M} (V_{0M})$  are the corresponding values for the matched samples.

**Table S4.** Balancing test for the mean difference before and after matching corresponding to the potential outcomes with the treatment variable of the *full* land ownership.

| Variable             | Sample | Outcome: Rice yield |             |             |             |             |             | Outcome: Informal debt |             |             |  |
|----------------------|--------|---------------------|-------------|-------------|-------------|-------------|-------------|------------------------|-------------|-------------|--|
|                      |        | Small               | Midsize     | Large       | Small       | Midsize     | Small       | Midsize                | Small       | Midsize     |  |
| Male                 | UM     | -0.1070             | *** -0.0796 | *** -0.0509 | *** -0.1070 | *** -0.0796 | *** -0.1070 | *** -0.0796            | *** -0.1070 | *** -0.0796 |  |
|                      | M      | -0.0014             | -0.0087     | -0.0054     | -0.0016     | -0.0071     | -0.0016     | -0.0071                | -0.0016     | -0.0071     |  |
| Age                  | UM     | 2.8960              | *** 2.7490  | *** 2.9850  | *** 2.8960  | *** 2.7490  | *** 2.8960  | *** 2.7490             | *** 2.8960  | *** 2.7490  |  |
|                      | M      | 0.0030              | 0.0700      | -0.1640     | 0.0390      | 0.0730      | 0.0390      | 0.0730                 | 0.0390      | 0.0730      |  |
| Primary education    | UM     | 0.0158              | *** 0.0116  | *** 0.0161  | *** 0.0158  | *** 0.0116  | *** 0.0158  | *** 0.0116             | *** 0.0158  | *** 0.0116  |  |
|                      | M      | 0.0069              | ** 0.0036   | 0.0041      | 0.0074      | ** 0.0031   | 0.0074      | ** 0.0031              | 0.0074      | ** 0.0031   |  |
| Single               | UM     | 0.0211              | *** 0.0158  | *** 0.0141  | *** 0.0211  | *** 0.0158  | *** 0.0211  | *** 0.0158             | *** 0.0211  | *** 0.0158  |  |
|                      | M      | 0.0057              | 0.0002      | 0.0039      | 0.0062      | 0.0004      | 0.0062      | 0.0004                 | 0.0062      | 0.0004      |  |
| Pct agri labor       | UM     | -0.0078             | 0.0079      | 0.0359      | *** -0.0078 | 0.0079      | *** -0.0078 | 0.0079                 | *** -0.0078 | 0.0079      |  |
|                      | M      | 0.0022              | 0.0001      | -0.0033     | 0.0027      | 0.0000      | 0.0027      | 0.0000                 | 0.0027      | 0.0000      |  |
| Work in agri only    | UM     | -0.0176             | ** 0.0156   | * 0.0052    | -0.0176     | ** 0.0156   | -0.0176     | ** 0.0156              | -0.0176     | * 0.0156    |  |
|                      | M      | -0.0015             | 0.0005      | -0.0069     | -0.0008     | 0.0014      | -0.0008     | 0.0014                 | -0.0008     | 0.0014      |  |
| Hire permanent labor | UM     | -0.0398             | *** -0.0290 | *** -0.0504 | *** -0.0398 | *** -0.0290 | *** -0.0398 | *** -0.0290            | *** -0.0398 | *** -0.0290 |  |
|                      | M      | 0.0003              | 0.0044      | 0.0116      | 0.0013      | 0.0061      | 0.0013      | 0.0061                 | 0.0013      | 0.0061      |  |
| Hire temporary labor | UM     | 0.0007              | 0.0005      | 0.0039      | 0.0007      | 0.0005      | 0.0007      | 0.0005                 | 0.0007      | 0.0005      |  |
|                      | M      | -0.0012             | 0.0015      | -0.0012     | -0.0010     | 0.0015      | -0.0010     | 0.0015                 | -0.0010     | 0.0015      |  |
| Farmer group member  | UM     | 0.0110              | 0.0186      | *** 0.0062  | 0.0110      | * 0.0186    | 0.0110      | * 0.0186               | 0.0110      | *** 0.0186  |  |
|                      | M      | -0.0039             | 0.0028      | 0.0027      | -0.0031     | 0.0024      | -0.0031     | 0.0024                 | -0.0031     | 0.0024      |  |
| Cooperative member   | UM     | 0.0036              | 0.0006      | 0.0027      | 0.0036      | 0.0006      | 0.0036      | 0.0006                 | 0.0036      | 0.0006      |  |
|                      | M      | 0.0065              | 0.0001      | -0.0035     | 0.0056      | 0.0002      | 0.0056      | 0.0002                 | 0.0056      | 0.0002      |  |
| Village fund member  | UM     | -0.0132             | *** -0.0073 | *** -0.0031 | -0.0132     | *** -0.0073 | -0.0132     | *** -0.0073            | -0.0132     | *** -0.0073 |  |
|                      | M      | -0.0010             | 0.0005      | 0.0011      | -0.0008     | 0.0006      | -0.0008     | 0.0006                 | -0.0008     | 0.0006      |  |

|                        |    |         |     |         |     |        |     |         |     |         |     |
|------------------------|----|---------|-----|---------|-----|--------|-----|---------|-----|---------|-----|
| Agri assoc. member     | UM | -0.0023 | **  | -0.0008 |     | -0.002 |     | -0.0023 |     | -0.0008 |     |
|                        | M  | 0.0009  |     | -0.0002 |     | -0.000 |     | 0.0004  |     | -0.0002 |     |
| Off-farm income        | UM | 0.0880  | *** | 0.0286  | *** | 0.0323 | *** | 0.0880  | *** | 0.0286  | *** |
|                        | M  | -0.0030 |     | -0.0031 |     | 0.0042 |     | -0.0065 |     | -0.0058 |     |
| Ratio rice area        | UM | 0.1234  | *** | 0.5899  | *** | 0.2428 | *** | 0.1234  | *** | 0.5899  | *** |
|                        | M  | -0.0018 |     | 0.0159  |     | -0.025 |     | -0.0028 |     | 0.0166  |     |
| Ratio rice area^2      | UM |         |     |         |     | -0.428 |     |         |     |         |     |
|                        | M  |         |     |         |     | -0.508 |     |         |     |         |     |
| Area harvested rice    | UM | -0.0010 |     | 0.0052  | *   | 0.0355 | *** | -0.0010 |     | 0.0052  | *   |
|                        | M  | -0.0095 | *** | -0.0087 | *** | -0.009 | *** | 0.0004  |     | 0.0028  |     |
| Integrated agriculture | UM | -2.6688 | *** | -2.0526 | *** | -0.871 | *** | -2.6688 | *** | -2.0526 | *** |
|                        | M  | -0.1981 | *** | -0.0879 |     | -0.069 |     | -0.1903 | *** | -0.0881 |     |
| Irrigate               | UM | -80000  | *** | -110000 | *** | -1900  | *** | -80000  | *** | -110000 | *** |
|                        | M  | 0       |     | 0       |     | -1000  |     | 0       |     | 0       |     |
| Rainfall               | UM | 81.800  | *** | 33.500  | *** | 22.700 | *** | 81.800  | *** | 33.5000 | *** |
|                        | M  | -2.5000 |     | -5.0000 | *   | -4.000 | *   | -2.9000 |     | -4.7000 | *   |
| Temperature            | UM | -0.0050 | *   | -0.0200 | *** | -0.067 | *** | -0.0050 | *   | -0.0200 | *** |
|                        | M  | 0.0000  |     | -0.0010 |     | 0.0000 |     | 0.0000  |     | -0.0010 |     |
| Municipal area         | UM | 0.0511  | *** | 0.0307  | *** | 0.0176 | **  | 0.0511  | *** | 0.0307  | *** |
|                        | M  | 0.0133  |     | 0.0032  |     | 0.0046 |     | 0.0148  | **  | 0.0037  |     |

Note: The kernel matching with Gaussian function is used for the balancing test. It performs relatively well across samples in terms of the matching quality. Other matching algorithms also provide very similar conclusion. \*\*\*, \*\*, \* are significant at the 1, 5, and 10% level, respectively. UM and M are abbreviation of unmatched and matched samples, respectively.

**Table S5.** Balancing test for the mean difference before and after matching corresponding to the potential outcomes with the treatment variable of the *weak* land ownership.

| Variable               | Sample | Outcome:<br>Rice yield |     | Outcome:<br>Informal debt |     |
|------------------------|--------|------------------------|-----|---------------------------|-----|
|                        |        | Small                  |     | Midsize                   |     |
| Male                   | UM     | -0.0999                | *** | -0.0747                   | *** |
|                        | M      | -0.0040                |     | -0.0077                   |     |
| Age                    | UM     | 3.1940                 | *** | 2.7130                    | *** |
|                        | M      | -0.0770                |     | -0.3520                   | **  |
| Primary education      | UM     | 0.0162                 | *** | 0.0082                    | **  |
|                        | M      | 0.0036                 |     | 0.0011                    |     |
| Single                 | UM     | 0.0156                 | *** | 0.0090                    | **  |
|                        | M      | 0.0034                 |     | -0.0021                   |     |
| Pct agri labor         | UM     | 0.0180                 | *** | 0.0391                    | *** |
|                        | M      | 0.0150                 | *** | 0.0031                    |     |
| Work in agri only      | UM     | -0.0053                |     | 0.0279                    | *** |
|                        | M      | 0.0191                 | *** | 0.0091                    |     |
| Hire permanent labor   | UM     | -0.0201                | **  | -0.0177                   | *   |
|                        | M      | -0.0187                | **  | -0.0054                   |     |
| Hire temporary labor   | UM     | 0.0027                 |     | 0.0018                    |     |
|                        | M      | 0.0013                 |     | 0.0014                    |     |
| Farmer group member    | UM     | 0.0072                 |     | 0.0102                    |     |
|                        | M      | -0.0087                | *   | -0.0015                   |     |
| Cooperative member     | UM     | -0.0021                |     | 0.0021                    |     |
|                        | M      | -0.0023                |     | 0.0017                    |     |
| Villageund member      | UM     | -0.0106                | *** | -0.0052                   | *   |
|                        | M      | 0.0013                 |     | 0.0005                    |     |
| Agri assoc. member     | UM     | -0.0019                |     | -0.0010                   |     |
|                        | M      | 0.0004                 |     | -0.0001                   |     |
| Off-farm income        | UM     | 0.0583                 | *** | 0.0024                    |     |
|                        | M      | -0.0222                | *** | -0.0168                   | *** |
| Ratio rice area        | UM     | 0.1380                 | *** | 0.6634                    | *** |
|                        | M      | 0.0134                 | **  | 0.0468                    | *   |
| Ratio rice area^2      | UM     |                        |     |                           |     |
|                        | M      |                        |     |                           |     |
| Area harvested rice    | UM     | 0.0076                 | **  | 0.0138                    | *** |
|                        | M      | -0.0043                | *   | 0.0044                    | *   |
| Integrated agriculture | UM     | -2.1995                | *** | -1.4653                   | *** |
|                        | M      | -0.1874                | **  | -0.0065                   |     |
| Irrigate               | UM     | -130000                | *** | -180000                   | *** |
|                        | M      | -10000                 |     | -20000                    | **  |
| Rainfall               | UM     | 81.3000                | *** | 37.0000                   | *** |
|                        | M      | -6.0000                |     | -1.5000                   |     |
| Temperature            | UM     | 0.0010                 |     | -0.0360                   | *** |
|                        | M      | 0.0010                 |     | -0.0040                   |     |
| Municipal area         | UM     | 0.0518                 | *** | 0.0249                    | *** |
|                        | M      | -0.0096                |     | -0.0072                   |     |

Note: The kernel matching with Gaussian function is used for the balancing test. It performs relatively well across samples in terms of the matching quality. Other matching algorithms also provide very similar conclusion. \*\*\*, \*\*, \* are significant at the 1, 5, and 10% level, respectively. UM and M are abbreviation of unmatched and matched samples, respectively.
